# Supplementary material for: Genetic Diversity in Bronchial Asthma Susceptibility: Exploring the Role of Vitamin D Receptor Gene Polymorphisms in Varied Geographic Contexts
Source: MDPI journal article supplement (doi:10.3390/ijms25031943), 2024-02-05
Supplement: s1 [file s1]

## Supporting information

**Table S1.** Comparison of MAF and genotype frequencies of VDR gene loci in Bronchial asthma and controls in Latvian population.

**Table S2.** Comparison of MAF and genotype frequencies of VDR gene loci in Bronchial asthma and controls in Lithuania population.

**Table S3.** An association analysis between the average 25(OH)D level of genotypes of VDR gene SNPs in Bronchial asthma and controls in Latvian population.

**Table S4.** An association analysis between the average 25(OH)D level of genotypes of VDR gene SNPs in Bronchial asthma and controls in Lithuanian population.

**Table S5.** Demographic characteristics of study subjects

**Table S1.** Comparison of MAF and genotype frequencies of VDR gene loci in Bronchial asthma and Control groups in Latvian (LV) population.

| SNPs of the VDR gene | MAF or genotype | Distribution of alleles and genotypes |       |               |       | Statistical analysis     |                         |                          |                         |
|----------------------|-----------------|---------------------------------------|-------|---------------|-------|--------------------------|-------------------------|--------------------------|-------------------------|
|                      |                 | BA patients                           |       | Control group |       | Additive model           |                         | Multiplicative model     |                         |
|                      |                 | <i>n</i>                              | %     | <i>n</i>      | %     | OR <sub>A</sub> [95% CI] | <i>p</i>                | OR <sub>M</sub> [95% CI] | <i>p</i>                |
| rs2286570<br>C>T     | T               | 128                                   | 43.24 | 215           | 42.49 | 1.03 [0.77 - 1.38]       | 0.84                    | -                        | -                       |
|                      | CC              | 41                                    | 27.70 | 78            | 30.83 | 1.16 [0.74 - 1.82]       | 0.51                    | 0.86 [0.55 - 1.35]       | 0.51                    |
|                      | CT              | 86                                    | 58.11 | 135           | 53.36 | 1.21 [0.76 - 1.93]       | 0.65                    | 1.21 [0.81 - 1.83]       | 0.36                    |
|                      | TT              | 21                                    | 14.19 | 40            | 15.81 | 1.00 [0.52 - 1.91]       | 1.00                    | 0.88 [0.50 - 1.36]       | 0.66                    |
| rs1544410<br>G>A     | A               | 115                                   | 38.85 | 184           | 36.36 | 1.11 [0.83 - 1.49]       | 0.48                    | -                        | -                       |
|                      | GG              | 62                                    | 41.89 | 97            | 38.34 | 0.86 [0.57 - 1.30]       | 0.48                    | 1.16 [0.77 - 1.75]       | 0.48                    |
|                      | GA              | 57                                    | 38.51 | 128           | 50.59 | 0.70 [0.45 - 1.09]       | 0.11                    | 0.61 [0.40 - 0.92]       | 1.92 × 10 <sup>-2</sup> |
|                      | AA              | 29                                    | 19.59 | 28            | 11.07 | 1.62 [0.88 - 2.98]       | 0.12                    | 1.04 [0.60 - 1.80]       | 0.90                    |
| rs7975232<br>T>G     | T               | 136                                   | 46.26 | 253           | 50.00 | 1.18 [0.88 - 1.57]       | 0.27                    | -                        | -                       |
|                      | GG              | 34                                    | 23.13 | 57            | 22.53 | 0.98 [0.60 - 1.58]       | 0.91                    | 1.03 [0.63 - 1.66]       | 0.92                    |
|                      | GT              | 68                                    | 46.26 | 139           | 54.94 | 0.82 [0.49 - 1.37]       | 0.13                    | 0.70 [0.46 - 1.05]       | 0.08                    |
|                      | TT              | 46                                    | 31.29 | 57            | 22.53 | 1.35 [0.76 - 2.41]       | 0.30                    | 0.81 [0.52 - 1.25]       | 0.33                    |
| rs731236<br>T>C      | C               | 140                                   | 47.62 | 167           | 33.00 | 1.85 [1.37 - 2.48]       | 4.16 × 10 <sup>-5</sup> | -                        | -                       |
|                      | TT              | 48                                    | 32.65 | 115           | 45.45 | 1.72 [1.12 - 2.63]       | 1.20 × 10 <sup>-2</sup> | 0.58 [0.38 - 0.89]       | 1.20 × 10 <sup>-2</sup> |
|                      | TC              | 58                                    | 39.46 | 109           | 43.08 | 1.27 [0.80 - 2.03]       | 1.02 × 10 <sup>-4</sup> | 0.86 [0.57 - 1.30]       | 0.48                    |
|                      | CC              | 41                                    | 27.89 | 29            | 11.46 | 3.39 [1.89 - 6.07]       | 2.73 × 10 <sup>-5</sup> | 1.41 [0.85 - 2.36]       | 0.18                    |

*n* – number of patients in Control and bronchial asthma (BA) groups; *p-values* by  $\chi^2$  test; OR<sub>A</sub> OR<sub>M</sub> – Odds ratio by additive or multiplicative model; 95% CI – confidence interval, statistically significant *p-values* (*p* < 0.05) in bold.

**Table S2.** Comparison of MAF and genotype frequencies of VDR gene loci in Bronchial asthma and Control groups in Lithuanian (LT) population.

| SNPs of the VDR gene | MAF or genotype | Distribution of alleles and genotypes |       |               |       | Statistical analysis     |                       |                          |                       |
|----------------------|-----------------|---------------------------------------|-------|---------------|-------|--------------------------|-----------------------|--------------------------|-----------------------|
|                      |                 | BA patients                           |       | Control group |       | Additive model           |                       | Multiplicative model     |                       |
|                      |                 | <i>n</i>                              | %     | <i>n</i>      | %     | OR <sub>A</sub> [95% CI] | <i>p</i>              | OR <sub>M</sub> [95% CI] | <i>p</i>              |
| rs2286570<br>C>T     | T               | 85                                    | 43.81 | 70            | 46.67 | 0.94 [0.61 - 1.43]       | 0.76                  | -                        | -                     |
|                      | CC              | 30                                    | 30.39 | 20            | 26.67 | 0.78 [0.40 - 1.53]       | 0.47                  | 1.28 [0.65 - 2.49]       | 0.47                  |
|                      | CT              | 49                                    | 50.52 | 44            | 58.67 | 0.74 [0.37 - 1.49]       | 0.40                  | 0.77 [0.42 - 1.40]       | 0.38                  |
|                      | TT              | 18                                    | 18.56 | 13            | 17.33 | 0.92 [0.37 - 2.29]       | 0.86                  | 1.38 [0.63 - 3.06]       | 0.42                  |
| rs1544410<br>G>A     | A               | 59                                    | 30.41 | 55            | 36.67 | 0.75 [0.48 - 1.19]       | 0.22                  | -                        | -                     |
|                      | GG              | 46                                    | 47.42 | 29            | 38.67 | 0.70 [0.38 - 1.29]       | 0.25                  | 1.43 [0.78 - 2.64]       | 0.25                  |
|                      | GA              | 43                                    | 44.33 | 37            | 49.33 | 0.73 [0.39 - 1.39]       | 0.34                  | 0.82 [0.32 - 2.44]       | 0.82                  |
|                      | AA              | 8                                     | 8.25  | 9             | 12.00 | 0.56 [0.19 - 1.62]       | 0.28                  | 0.89 [0.32 - 2.44]       | 0.82                  |
| rs7975232<br>T>G     | T               | 96                                    | 51.06 | 73            | 50.00 | 0.94 [0.62 - 1.43]       | 0.77                  | -                        | -                     |
|                      | GG              | 27                                    | 28.72 | 23            | 31.51 | 0.96 [0.48 - 1.91]       | 0.90                  | 1.05 [0.52 - 2.08]       | 0.90                  |
|                      | GT              | 46                                    | 48.94 | 35            | 47.95 | 1.00 [0.48 - 2.10]       | 1.00                  | 1.17 [0.60 - 2.30]       | 0.64                  |
|                      | TT              | 25                                    | 26.60 | 19            | 26.03 | 0.89 [0.39 - 2.02]       | 0.78                  | 1.17 [0.60 - 2.30]       | 0.64                  |
| rs731236<br>T>C      | C               | 58                                    | 30.83 | 62            | 42.43 | 0.60 [0.39 - 0.95]       | $2.82 \times 10^{-2}$ | -                        | -                     |
|                      | TT              | 43                                    | 45.74 | 19            | 26.03 | 0.42 [0.22 - 0.81]       | 0.06                  | 2.40 [1.24 - 4.64]       | $8.90 \times 10^{-3}$ |
|                      | TC              | 44                                    | 46.81 | 46            | 63.01 | 0.42 [0.21 - 0.83]       | $1.22 \times 10^{-2}$ | 0.52 [0.28 - 0.96]       | 0.04                  |
|                      | CC              | 7                                     | 7.45  | 8             | 10.96 | 0.39 [1.12 - 1.22]       | 0.10                  | 0.88 [0.30 - 2.55]       | 0.81                  |

*n* – number of patients in Control and bronchial asthma (BA) groups; *p-values* by  $\chi^2$  test; OR<sub>A</sub> OR<sub>M</sub> – Odds ratio by additive or multiplicative model; 95% CI – confidence interval, statistically significant *p-values* (*p* < 0.05) in bold.

**Table S3.** An association analysis between the average 25(OH)D level of genotypes of VDR gene SNPs in Bronchial asthma and Control groups in Latvian population.

| Locus /<br>variation | Group ( <i>n</i> ) | Genotype | <i>n</i> | 25(OH)D level, ng/ml |       |       |       |       |        |       | <i>p</i> / $\eta$ |              |
|----------------------|--------------------|----------|----------|----------------------|-------|-------|-------|-------|--------|-------|-------------------|--------------|
|                      |                    |          |          | Mean                 | SD    | Min   | Max   | CI95% | Median | IQR   |                   |              |
| rs2228570<br>C>T     | BA (72)            | TT       | 12       | 28.05                | 14.58 | 6.39  | 56.56 | 18.79 | 37.31  | 24.87 | 18.66             | 0.86 / 0.08  |
|                      |                    | CT       | 38       | 26.08                | 9.91  | 9.60  | 48.06 | 22.82 | 29.33  | 24.93 | 17.23             |              |
|                      |                    | CC       | 22       | 27.01                | 10.18 | 9.66  | 45.19 | 22.49 | 31.52  | 26.49 | 17.68             |              |
|                      | Control (47)       | TT       | 12       | 26.53                | 5.55  | 20.93 | 37.52 | 23.00 | 30.05  | 24.79 | 8.00              | 0.68 / 0.13  |
|                      |                    | CT       | 24       | 24.05                | 7.71  | 3.63  | 39.34 | 20.79 | 27.30  | 23.97 | 8.33              |              |
|                      |                    | CC       | 11       | 24.78                | 10.18 | 13.83 | 49.69 | 17.94 | 31.62  | 23.41 | 13.21             |              |
| rs1544410<br>G>A     | BA (72)            | AA       | 11       | 32.47                | 13.23 | 9.60  | 48.06 | 23.58 | 41.36  | 38.91 | 19.96             | 0.056 / 0.29 |
|                      |                    | GA       | 27       | 27.87                | 9.23  | 14.79 | 45.19 | 24.21 | 31.52  | 25.97 | 16.25             |              |
|                      |                    | GG       | 34       | 23.88                | 10.37 | 6.39  | 56.56 | 20.27 | 27.50  | 24.15 | 13.56             |              |
|                      | Control (47)       | AA       | 11       | 24.47                | 8.74  | 3.63  | 37.52 | 18.59 | 30.34  | 24.96 | 7.73              | 0.98 / 0.03  |
|                      |                    | GA       | 15       | 24.77                | 6.78  | 13.01 | 34.95 | 21.02 | 28.53  | 23.81 | 9.97              |              |
|                      |                    | GG       | 21       | 25.11                | 8.31  | 14.53 | 49.69 | 21.33 | 28.89  | 24.12 | 8.29              |              |
| rs7975232<br>T>G     | BA (72)            | GG       | 18       | 24.44                | 7.02  | 13.36 | 38.73 | 20.95 | 27.93  | 25.15 | 11.44             | 0.58 / 0.13  |
|                      |                    | TG       | 35       | 27.15                | 11.51 | 6.39  | 56.56 | 23.19 | 31.10  | 23.86 | 16.88             |              |
|                      |                    | TT       | 19       | 27.97                | 12.28 | 9.60  | 48.06 | 22.06 | 33.89  | 25.97 | 24.86             |              |
|                      | Control (47)       | GG       | 12       | 24.71                | 6.42  | 13.01 | 39.34 | 20.63 | 28.79  | 23.81 | 7.19              | 0.73 / 0.12  |
|                      |                    | TG       | 25       | 24.23                | 8.88  | 3.63  | 49.69 | 20.56 | 27.89  | 23.81 | 9.90              |              |
|                      |                    | TT       | 10       | 26.59                | 6.70  | 19.33 | 37.52 | 21.80 | 31.38  | 25.47 | 13.50             |              |
| rs731236<br>T>C      | BA (72)            | CC       | 34       | 26.88                | 10.83 | 6.39  | 47.90 | 23.10 | 30.66  | 25.04 | 21.52             | 0.21 / 0.21  |
|                      |                    | TC       | 26       | 24.42                | 9.13  | 9.66  | 44.01 | 20.74 | 28.11  | 23.11 | 15.32             |              |
|                      |                    | TT       | 12       | 31.06                | 13.03 | 9.60  | 56.56 | 22.78 | 39.34  | 27.72 | 17.09             |              |
|                      | Control (47)       | CC       | 7        | 26.70                | 6.72  | 19.33 | 37.52 | 20.49 | 32.91  | 24.96 | 12.47             | 0.13 / 0.12  |
|                      |                    | TC       | 15       | 23.79                | 7.82  | 3.63  | 33.95 | 19.46 | 28.12  | 23.81 | 9.53              |              |
|                      |                    | TT       | 25       | 24.97                | 8.22  | 13.01 | 49.69 | 21.58 | 28.36  | 24.12 | 8.29              |              |

*n* – number of patients in groups; SD - standard deviation; CI 95% - 95% confidence interval of mean; IQR – inter quarter interval; *p* – Statistical significance of mean with ANOVA;  $\eta$  – a measure of association.

**Table S4.** An association analysis between the average 25(OH)D level of genotypes of VDR gene SNPs in Bronchial asthma and Control groups in Lithuanian population.

| Locus /<br>variation | Group ( <i>n</i> ) | Genotype | <i>n</i> | 25(OH)D level, ng/ml |      |       |       |       |        |       | <i>p</i> / $\eta$ |                           |
|----------------------|--------------------|----------|----------|----------------------|------|-------|-------|-------|--------|-------|-------------------|---------------------------|
|                      |                    |          |          | Mean                 | SD   | Min   | Max   | CI95% | Median | IQR   |                   |                           |
| rs2228570<br>C>T     | BA (97)            | TT       | 30       | 18.75                | 7.22 | 10.06 | 33.28 | 16.06 | 21.45  | 17.20 | 11.60             | 0.28 / 0.16 <sup>KW</sup> |
|                      |                    | CT       | 49       | 16.33                | 6.99 | 2.03  | 33.53 | 14.32 | 18.34  | 14.85 | 8.23              |                           |
|                      |                    | CC       | 18       | 17.96                | 5.59 | 8.22  | 28.68 | 15.17 | 20.74  | 17.48 | 10.10             |                           |
|                      | Control (77)       | TT       | 20       | 22.11                | 6.76 | 10.66 | 35.57 | 18.95 | 25.28  | 20.55 | 12.39             | 0.27 / 0.19 <sup>A</sup>  |
|                      |                    | CT       | 44       | 25.25                | 6.93 | 12.64 | 42.24 | 23.14 | 27.35  | 26.61 | 9.55              |                           |
|                      |                    | CC       | 13       | 24.14                | 8.51 | 14.23 | 36.63 | 19.00 | 29.28  | 22.51 | 17.70             |                           |
| rs1544410<br>G>A     | BA (97)            | AA       | 8        | 19.35                | 7.30 | 12.84 | 33.53 | 13.25 | 25.45  | 15.94 | 10.90             | 0.50 / 0.13 <sup>KW</sup> |
|                      |                    | GA       | 43       | 17.84                | 7.19 | 5.69  | 33.47 | 15.62 | 20.05  | 15.59 | 10.49             |                           |
|                      |                    | GG       | 46       | 16.56                | 6.54 | 2.03  | 30.02 | 14.62 | 18.50  | 15.33 | 9.80              |                           |
|                      | Control (75)       | AA       | 9        | 26.74                | 7.54 | 18.23 | 38.34 | 20.95 | 32.54  | 27.54 | 14.21             | 0.38 / 0.16 <sup>A</sup>  |
|                      |                    | GA       | 37       | 24.71                | 7.45 | 10.66 | 42.24 | 22.23 | 27.20  | 26.41 | 10.94             |                           |
|                      |                    | GG       | 29       | 23.08                | 6.94 | 12.64 | 36.71 | 20.43 | 25.72  | 24.06 | 12.13             |                           |
| rs7975232<br>T>G     | BA (98)            | GG       | 25       | 17.59                | 8.01 | 5.69  | 33.53 | 14.28 | 20.89  | 14.85 | 8.43              | 0.32 / 0.13 <sup>KW</sup> |
|                      |                    | TG       | 46       | 17.97                | 6.17 | 6.23  | 32.51 | 16.14 | 19.80  | 16.61 | 9.53              |                           |
|                      |                    | TT       | 27       | 15.87                | 6.94 | 2.03  | 29.97 | 13.12 | 18.61  | 13.87 | 10.78             |                           |
|                      | Control (77)       | GG       | 19       | 24.69                | 6.99 | 14.23 | 42.24 | 21.32 | 28.06  | 23.34 | 9.08              | 0.62 / 0.11 <sup>A</sup>  |
|                      |                    | TG       | 35       | 24.82                | 7.77 | 10.66 | 38.34 | 22.15 | 27.49  | 26.90 | 12.39             |                           |
|                      |                    | TT       | 23       | 23.00                | 6.58 | 12.64 | 36.71 | 20.15 | 25.84  | 24.06 | 11.75             |                           |
| rs731236<br>T>C      | BA (94)            | CC       | 7        | 19.95                | 7.67 | 12.84 | 33.53 | 12.85 | 27.04  | 16.70 | 12.67             | 0.25 / 0.18 <sup>KW</sup> |
|                      |                    | TC       | 44       | 18.29                | 7.19 | 5.69  | 33.47 | 16.11 | 20.48  | 16.98 | 10.37             |                           |
|                      |                    | TT       | 43       | 16.25                | 6.47 | 2.03  | 30.02 | 14.26 | 18.24  | 14.85 | 8.56              |                           |
|                      | Control (73)       | CC       | 8        | 25.96                | 7.66 | 18.23 | 38.34 | 19.56 | 32.37  | 24.02 | 13.68             | 0.40 / 0.10 <sup>A</sup>  |
|                      |                    | TC       | 46       | 24.90                | 7.28 | 10.66 | 42.24 | 22.73 | 27.06  | 26.61 | 10.23             |                           |
|                      |                    | TT       | 19       | 22.50                | 7.42 | 12.64 | 36.71 | 18.92 | 26.07  | 24.06 | 12.67             |                           |

n – number of patients in groups; SD - standard deviation; CI 95% - 95% confidence interval of mean; IQR – inter quarter interval; p – Statistical significance of mean with ANOVA (A) or Kruskal-Wallis (KW) test;  $\eta$  – a measure of association.

**Table S5.** Demographic characteristics of study subjects

| Population                         | N (%) / Mean (SD) |               | <i>p</i> |
|------------------------------------|-------------------|---------------|----------|
|                                    | BA patients       | Control group |          |
| <b>Latvian</b> ( <i>n</i> = 401)   | 149               | 252           |          |
| Sex (female)                       | 54 (56%)          | 148 (59%)     | <0.0001  |
| Age                                | 11.72 (9.77)      | 48.52 (9.07)  | <0.0001  |
| 25(OH)D level in plasma            | 26.69 (10.74)     | 24.68 (7.68)  | n.s.     |
| <b>Lithuania</b> ( <i>n</i> = 175) | 98                | 77            |          |
| Sex (female)                       | 66 (67%)          | 49 (64%)      | 0.072    |
| Age                                | 42.68 (13.56)     | 35.08 (12.41) | <0.0001  |
| 25(OH)D level in plasma            | 17.29 (6.87)      | 24.24 (7.19)  | <0.0001  |

*n* – number of patients in Control (C) and bronchial asthma (BA) groups; *p* – Statistical significance of mean with ANOVA
